# Supplementary material for: SARAspeech—Feasibility of automated assessment of ataxic speech disturbance
Source: Springer Nature journal article supplement (doi:10.1038/s41746-023-00787-x), 2023-03-16
Supplement: 41746_2023_787_MOESM1_ESM.pdf [file 41746_2023_787_MOESM1_ESM.pdf]

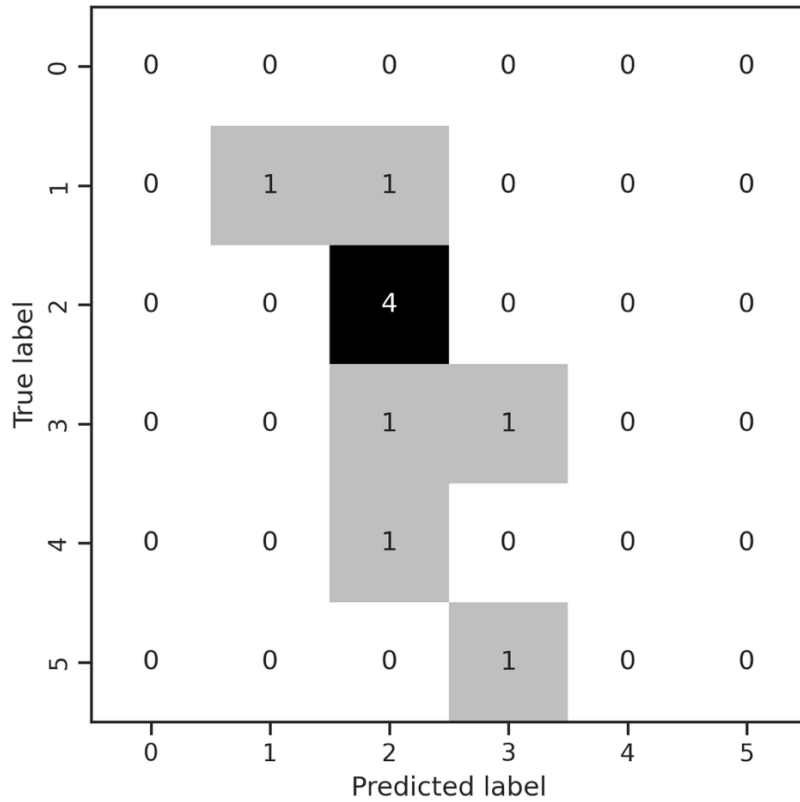

**Supplementary Figure 1:** Confusion matrix of true and predicted SARA-scores in an additional hold-out set based on SARA<sup>speech</sup> machine learning approach using a broad set of voice features.

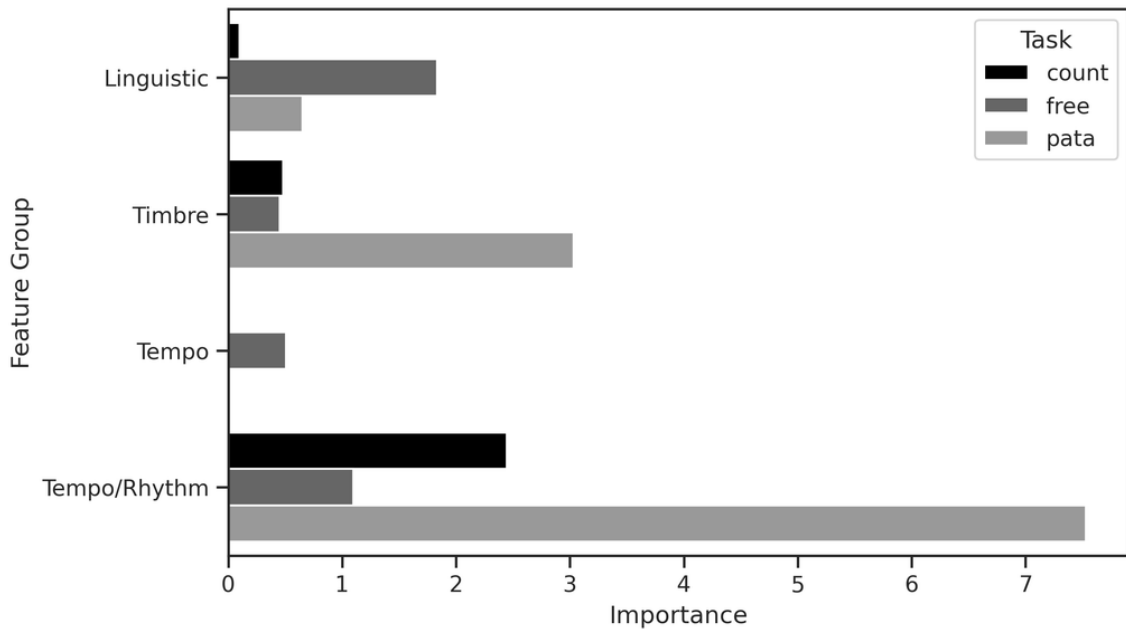

**Supplementary Figure 2:** Top ten voice and speech features contributing to prediction analysis results depending on specific speech task.

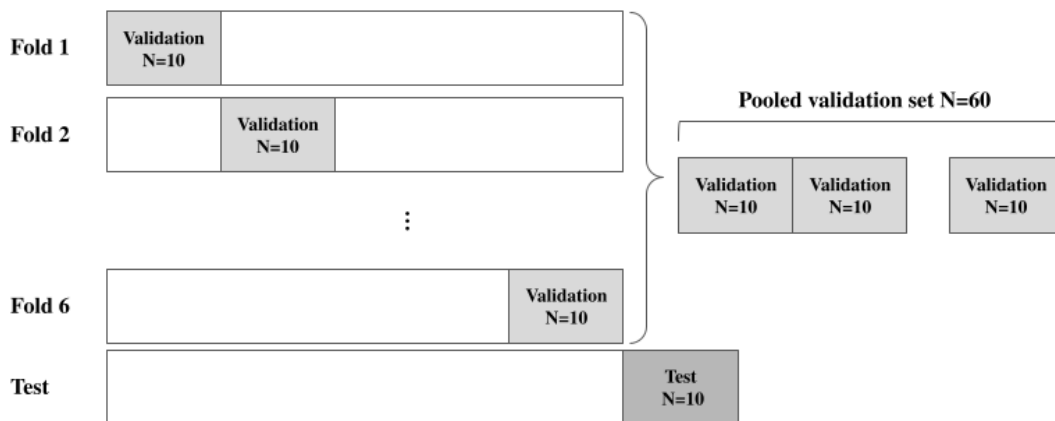

**Supplementary Figure 3:** Performance of the trained SARA<sup>speech</sup> system was evaluated in a 6-fold cross validation scheme with an additional hold out set.

| Domain         | Name          | Capturing                       | Basis               | Implementation of Basis                                                                        | Comment                                                                                                  |
|----------------|---------------|---------------------------------|---------------------|------------------------------------------------------------------------------------------------|----------------------------------------------------------------------------------------------------------|
| Paralinguistic | Spectral      | Timbre                          | STFT-Spectrogram    | <a href="#">librosa.stft</a>                                                                   | Further developed                                                                                        |
|                | Tempo         | Speech Tempo                    | (Fourier) Tempogram | <a href="#">librosa.feature.tempogram</a><br><a href="#">librosa.feature.fourier_tempogram</a> | Further developed                                                                                        |
|                | Rhythm        | Speech Rhythmicity, Variability | Onset-Envelope      | <a href="#">librosa.onset_strength</a>                                                         | Further developed                                                                                        |
| Linguistic     | Pronunciation | Intelligibility<br>Speech Tempo | Speech-to-text      | <a href="#">sttWithMetadata</a>                                                                | - Count of words<br>- Count of real-words<br>- Confidence score (intelligibility)<br>- Duration of words |

**Supplementary Table 1:** Open-source features used for further development and analysis.
